# Supplementary material for: Synthesis of 4-methyl-2,3-disubstituted quinoline scaffolds via environmentally benign Fe(iii) catalysed sequential condensation, cyclization and aromatization of 1,3-diketone and 2-ethynylaniline
Source: Royal Society of Chemistry journal article supplement (doi:10.1039/c4ra03666b), 2014-09-29
Supplement: c4ra03666b1.pdf [file c4ra03666b1.pdf]

## Synthesis of 4-methyl-2,3-disubstituted quinolines scaffolds *via* environmentally benign Fe(III) catalysed sequential condensation, cyclization and aromatization of 1,3-diketone and 2-ethynyl aniline

Mahalingam Sivaraman and Paramasivan T. Perumal \*

Organic Chemistry Division, CSIR-Central Leather Research Institute, Adyar, Chennai, 600020, Tamilnadu, India. Fax: +91 44 24911589; Tel: +91 44 24913289; E-mail: [ptperumal@gmail.com](mailto:ptperumal@gmail.com)

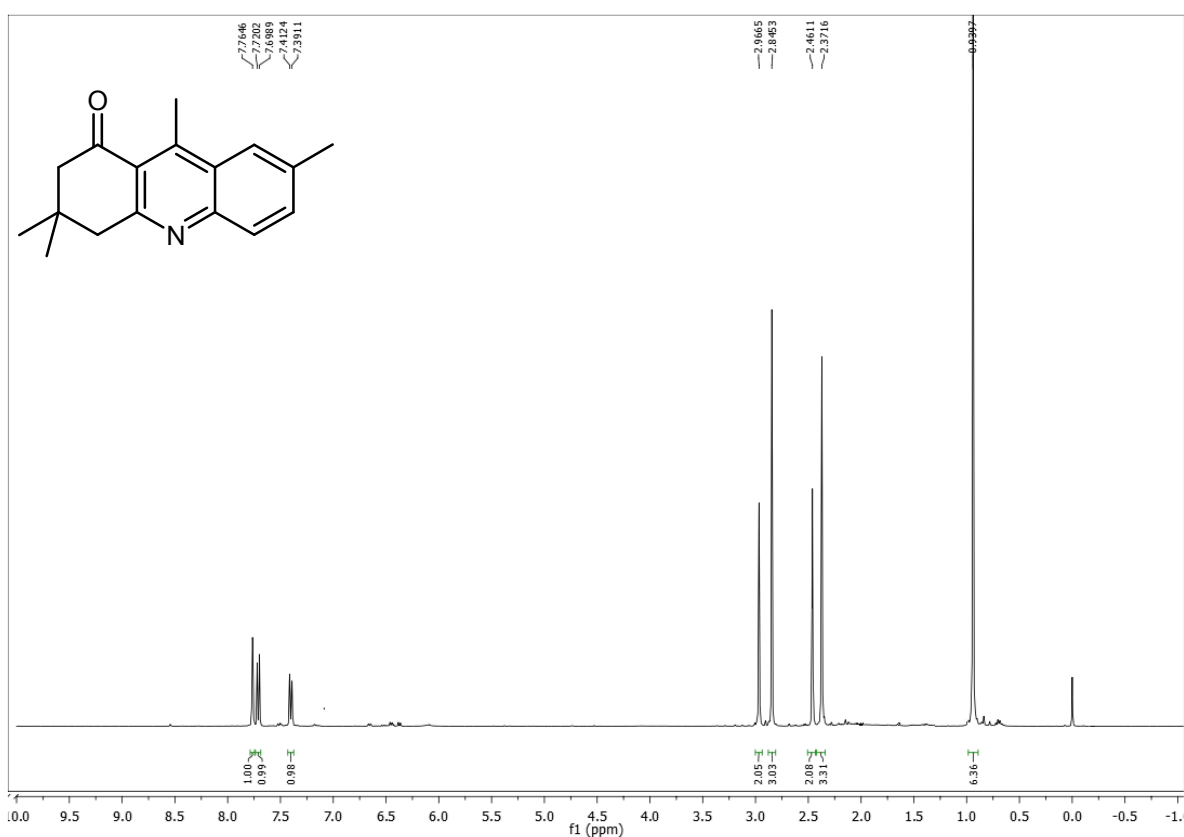

<sup>1</sup>H NMR spectrum of 3,4-dihydro-3,3,7,9-tetramethylacridin-1(2H)-one **3i**

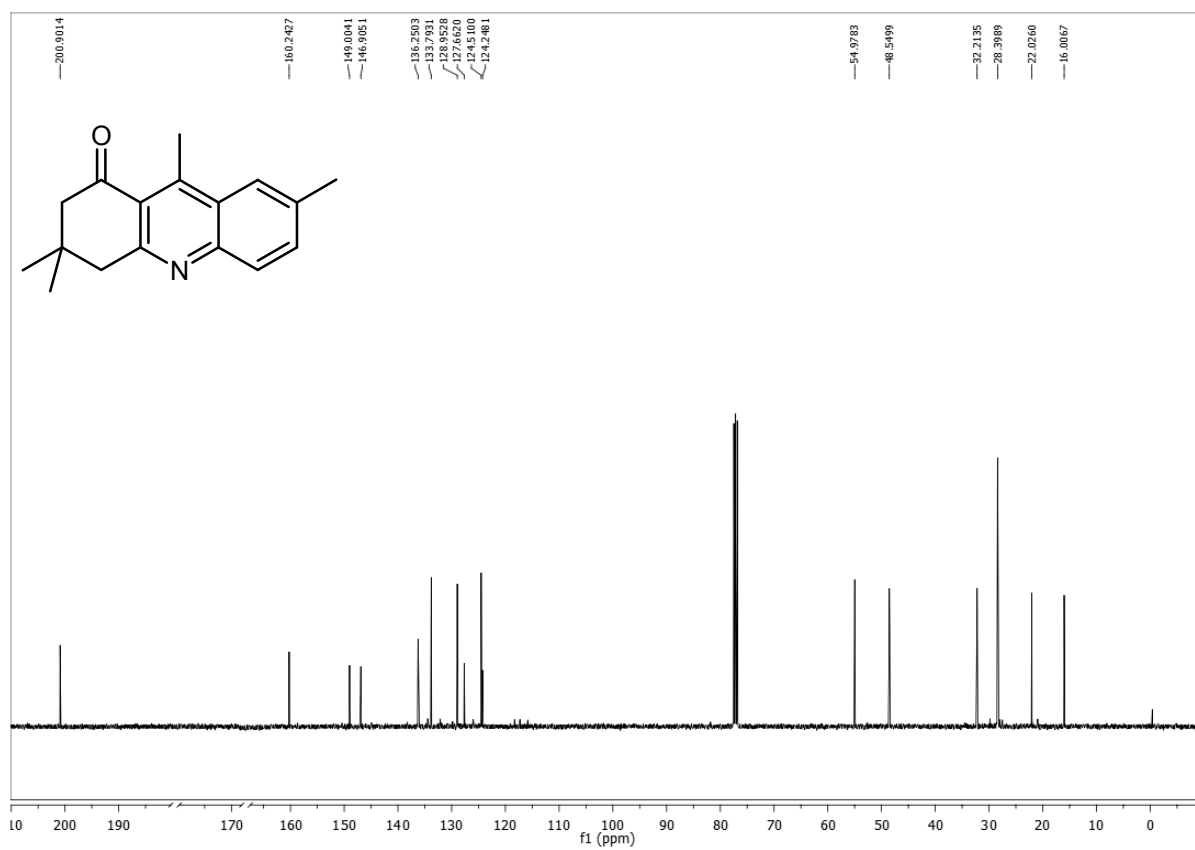

$^{13}\text{C}$  NMR spectrum of 3,4-dihydro-3,3,7,9-tetramethylacridin-1(2H)-one **3i**

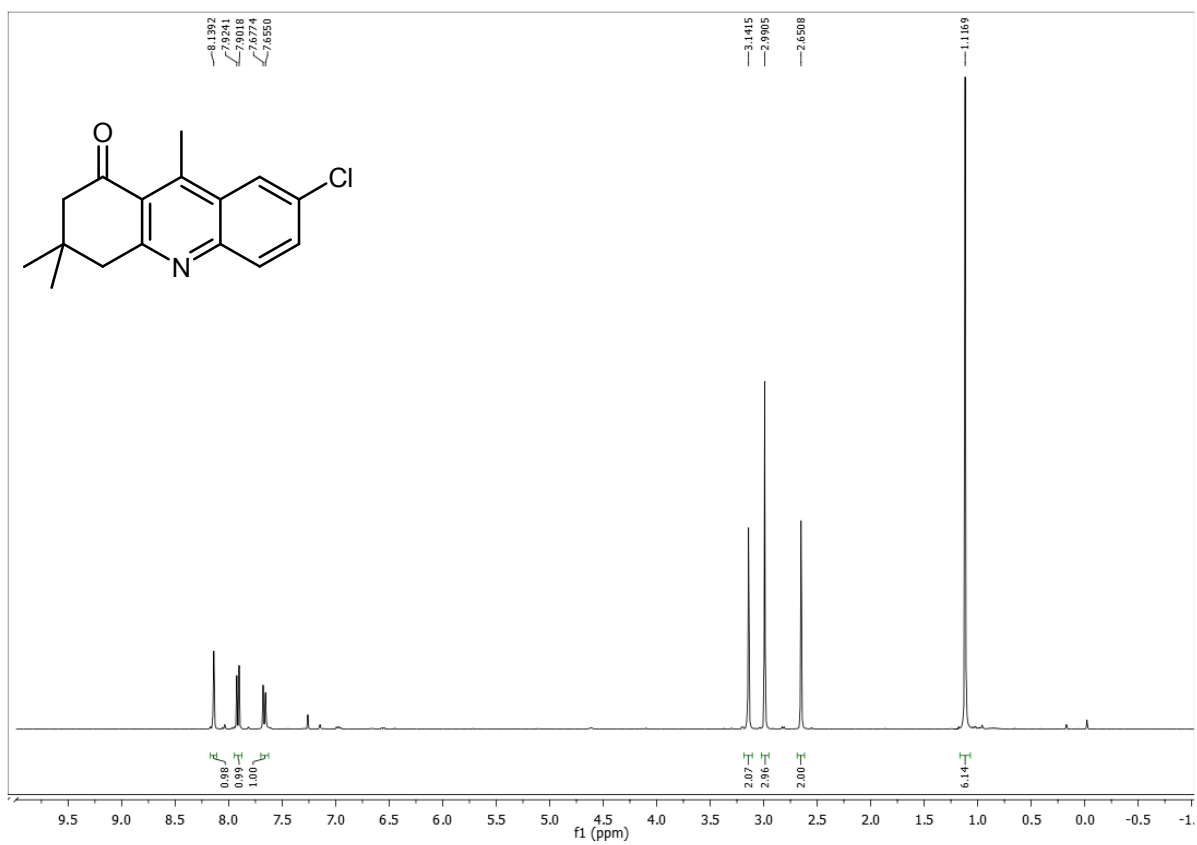

<sup>1</sup>H NMR spectrum of 7-chloro-3,4-dihydro-3,3,9-trimethylacridin-1(2H)-one **3j**

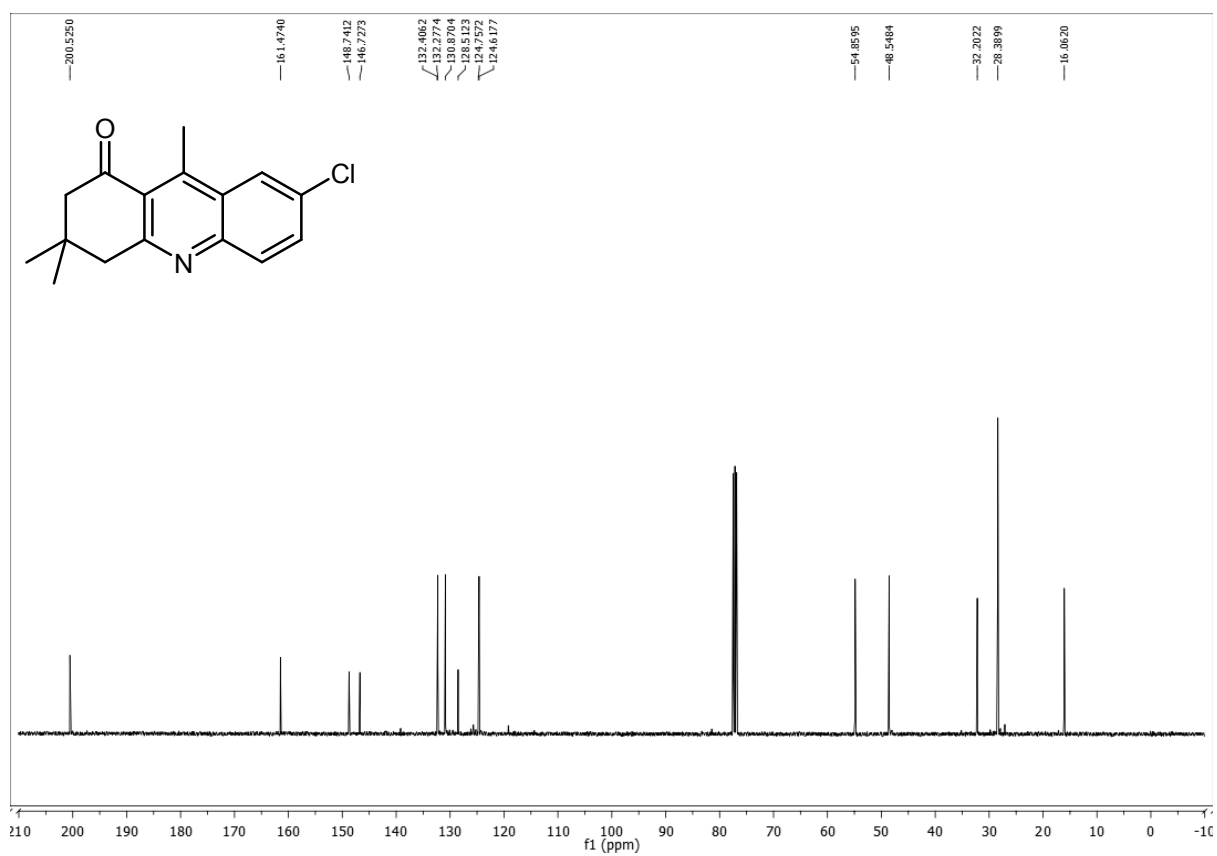

<sup>13</sup>C NMR spectrum of 7-chloro-3,4-dihydro-3,3,9-trimethylacridin-1(2H)-one **3j**

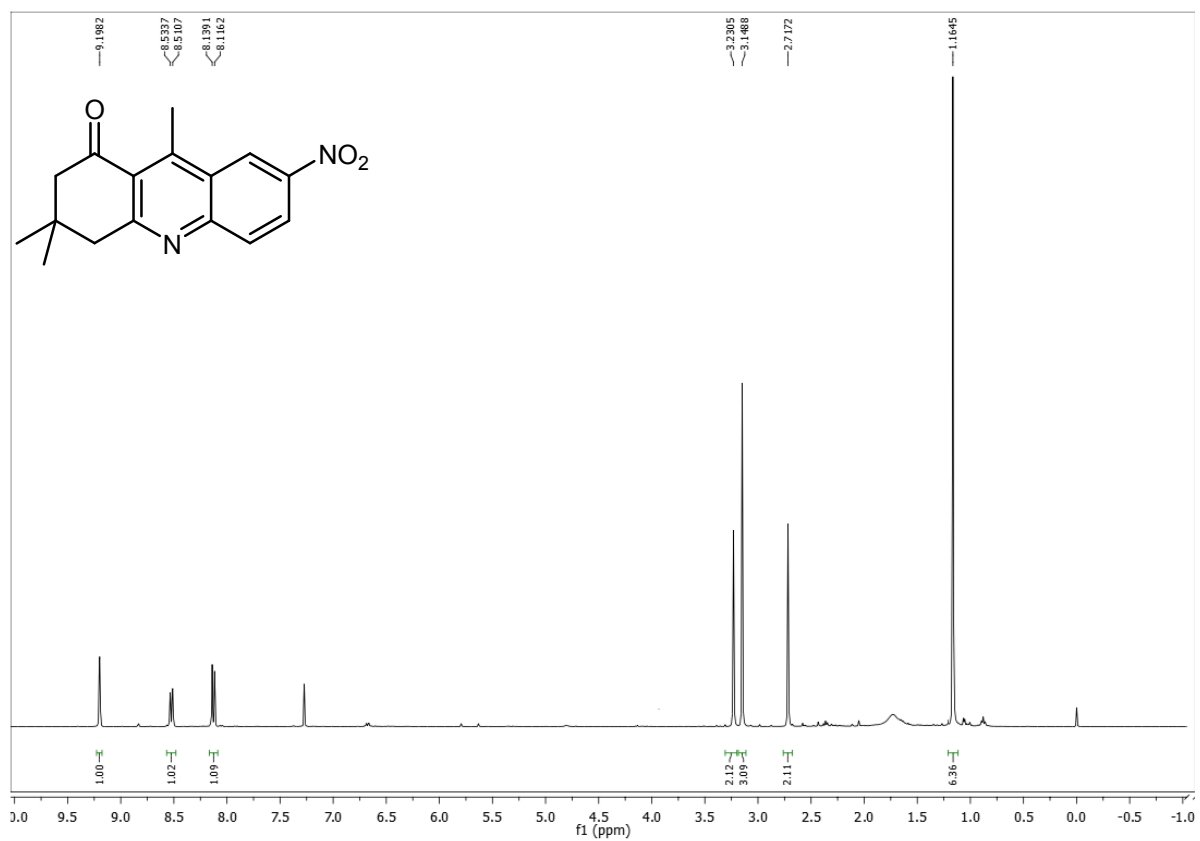

<sup>1</sup>H NMR spectrum of 3,4-dihydro-3,3,9-trimethyl-7-nitroacridin-1(2H)-one **3k**

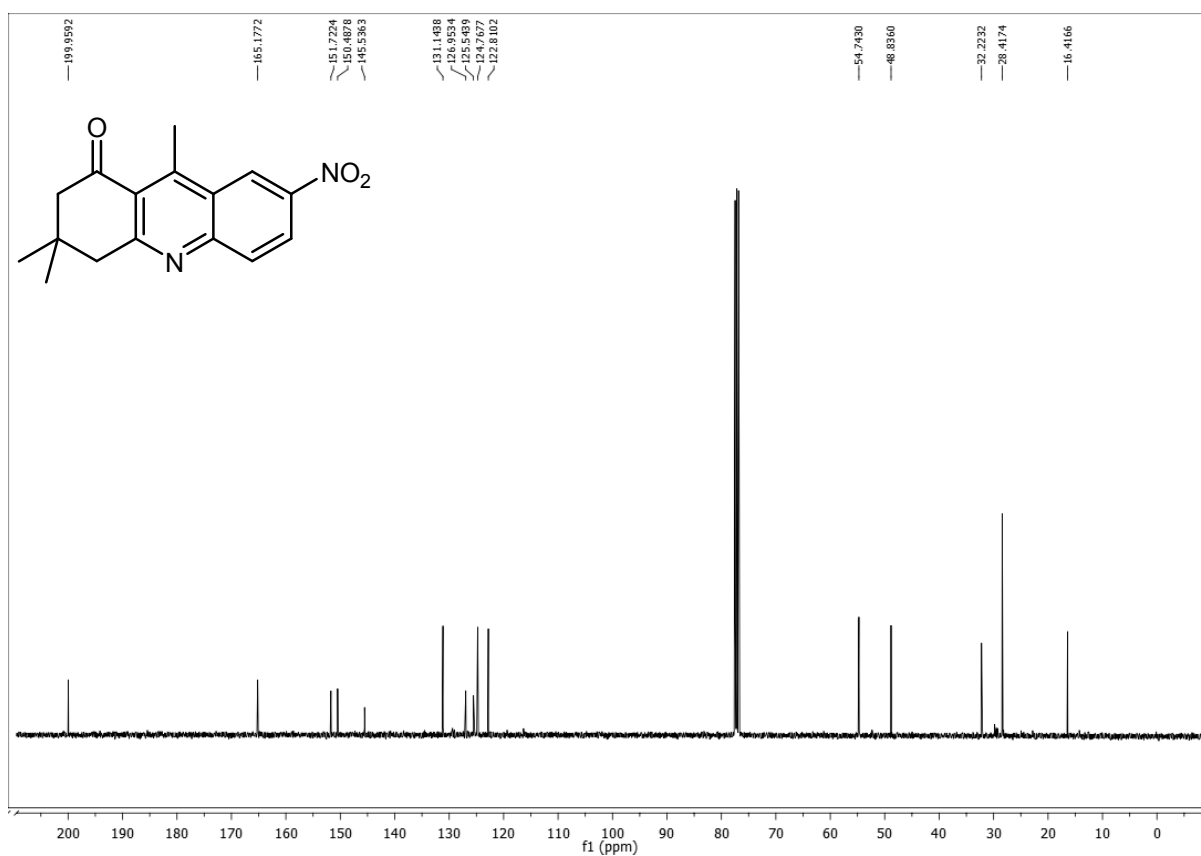

$^{13}\text{C}$  NMR spectrum of 3,4-dihydro-3,3,9-trimethyl-7-nitroacridin-1(2H)-one **3k**

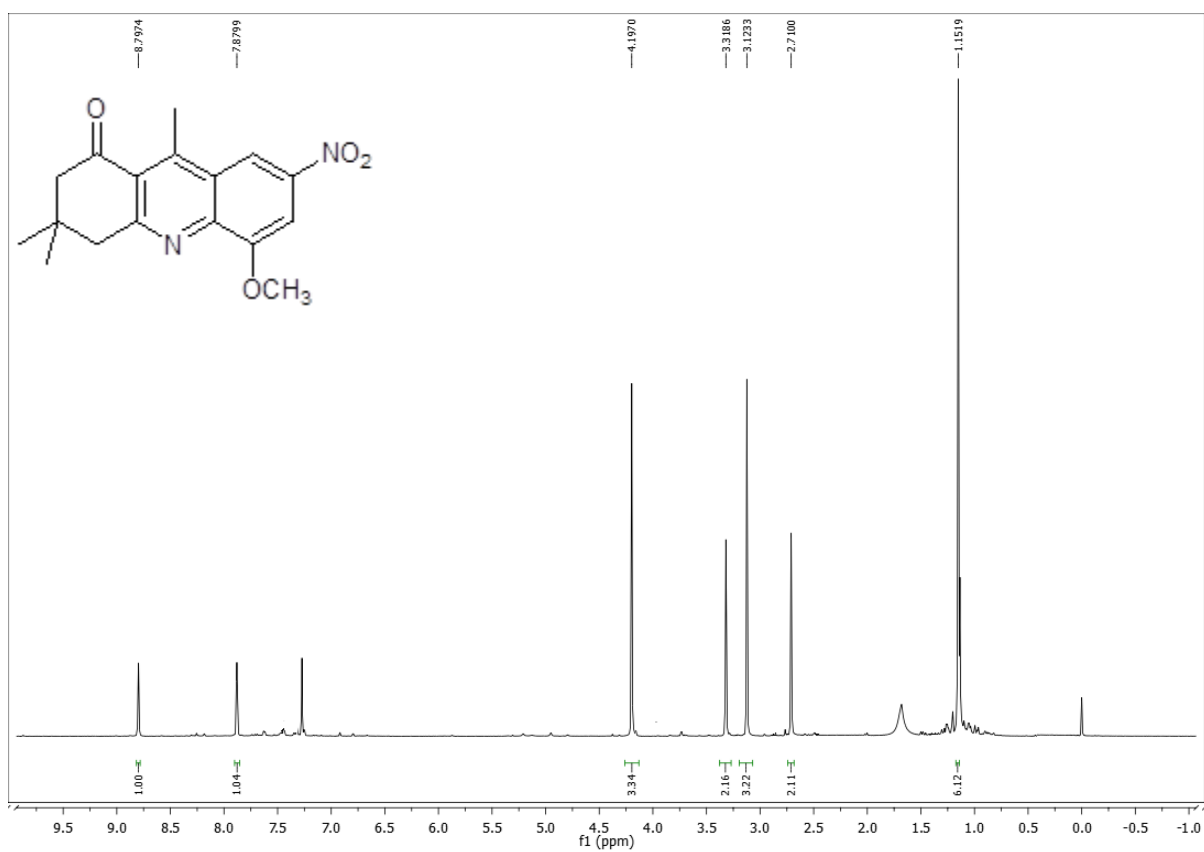

<sup>1</sup>H NMR spectrum of 3,4-dihydro-5-methoxy-3,3,9-trimethyl-7-nitroacridin-1(2H)-one **31**

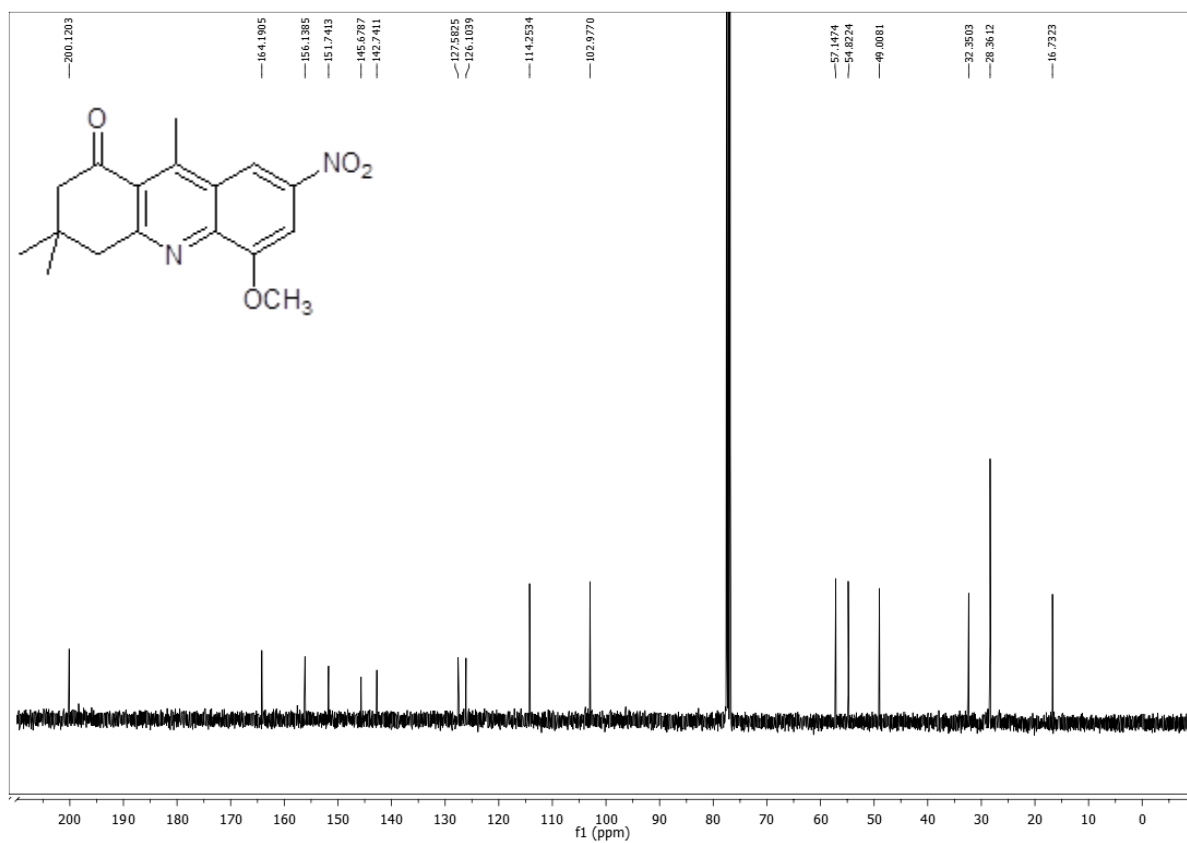

$^{13}\text{C}$  NMR spectrum of 3,4-dihydro-5-methoxy-3,3,9-trimethyl-7-nitroacridin-1(2H)-one **31**



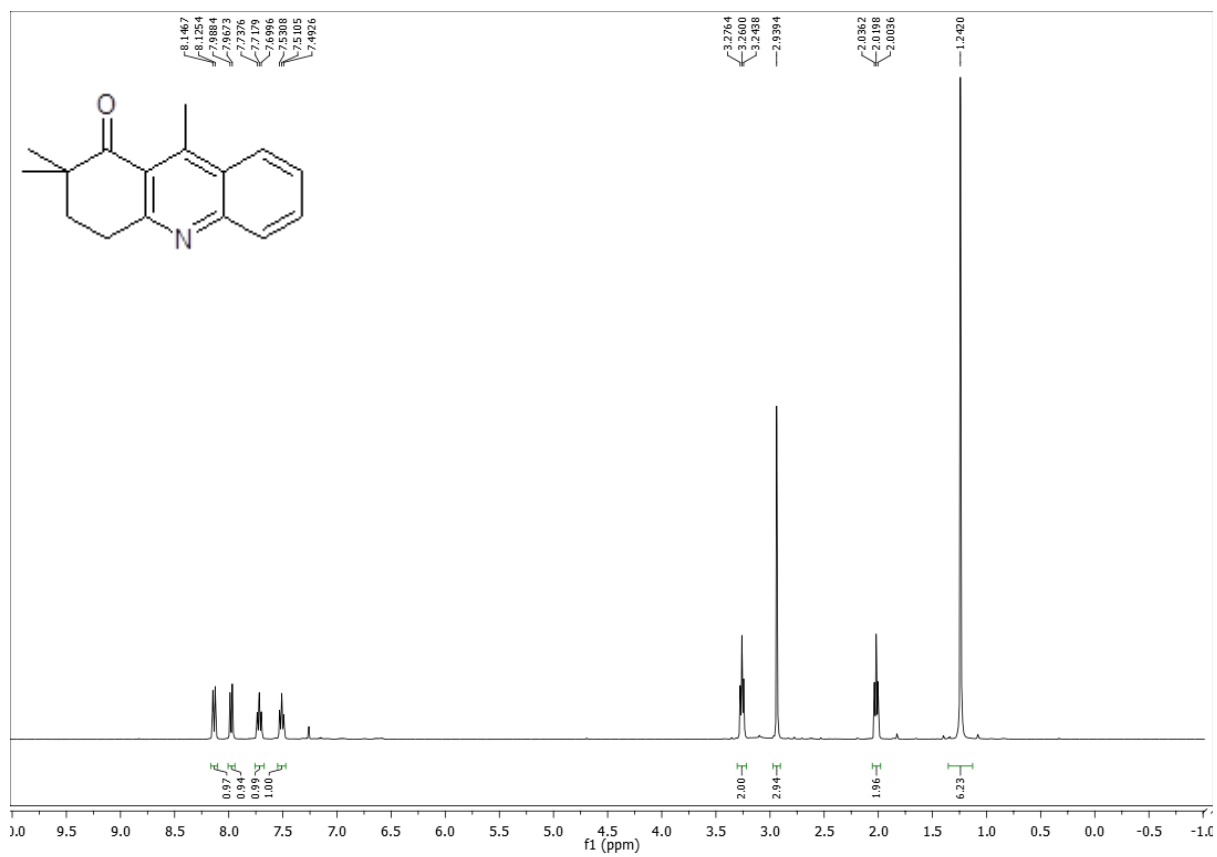

<sup>1</sup>H NMR spectrum of 3,4-dihydro-2,2,9-trimethylacridin-1(2H)-one **3d**

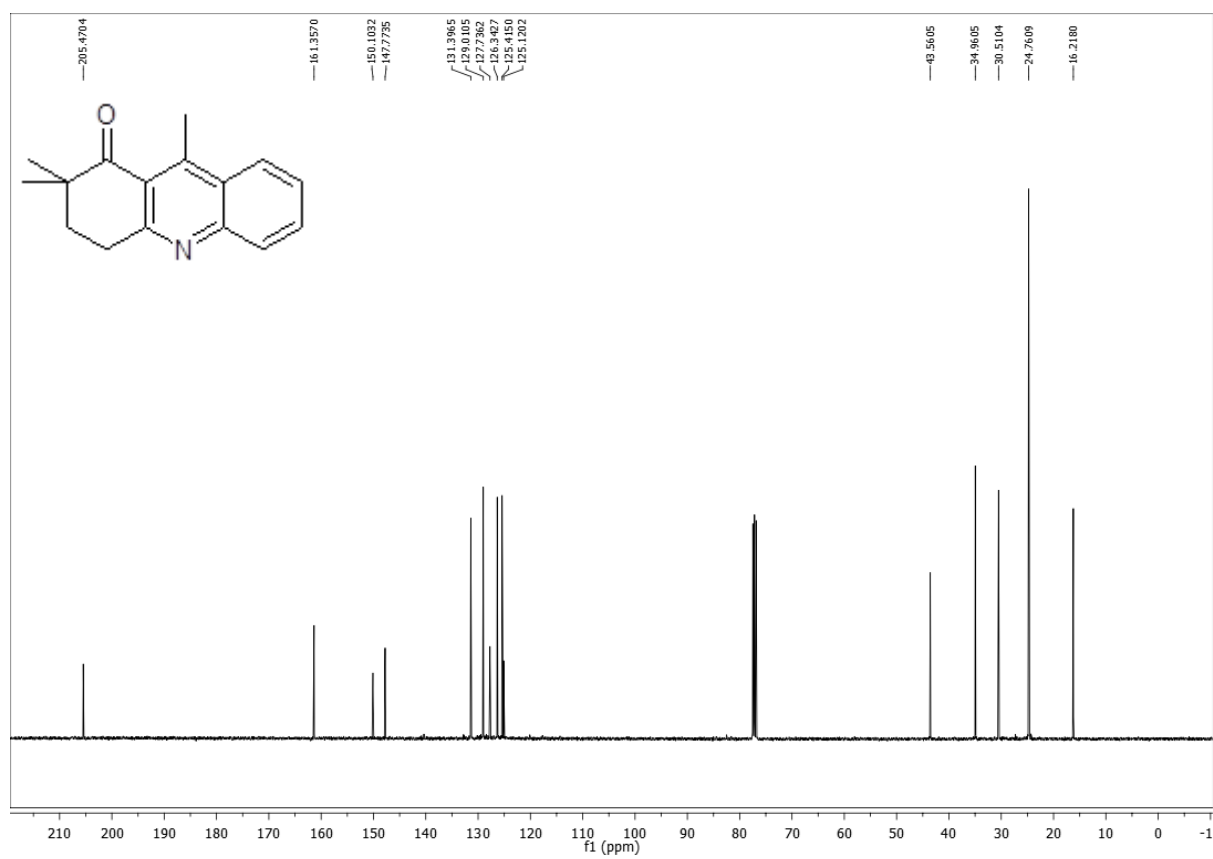

$^{13}\text{C}$  NMR spectrum of 3,4-dihydro-2,2,9-trimethylacridin-1(2H)-one **3d**

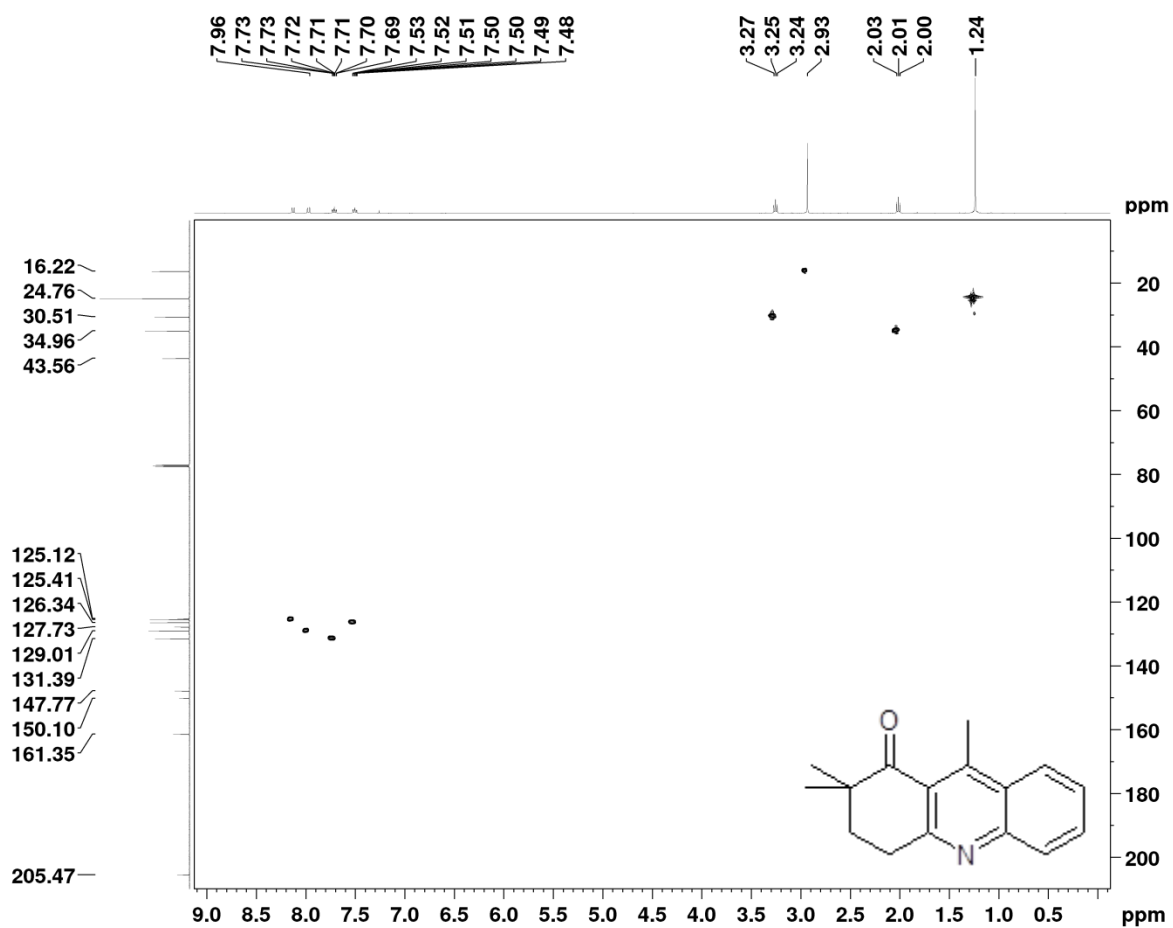

HSQC of 3,4-dihydro-2,2,9-trimethylacridin-1(2H)-one **3d**

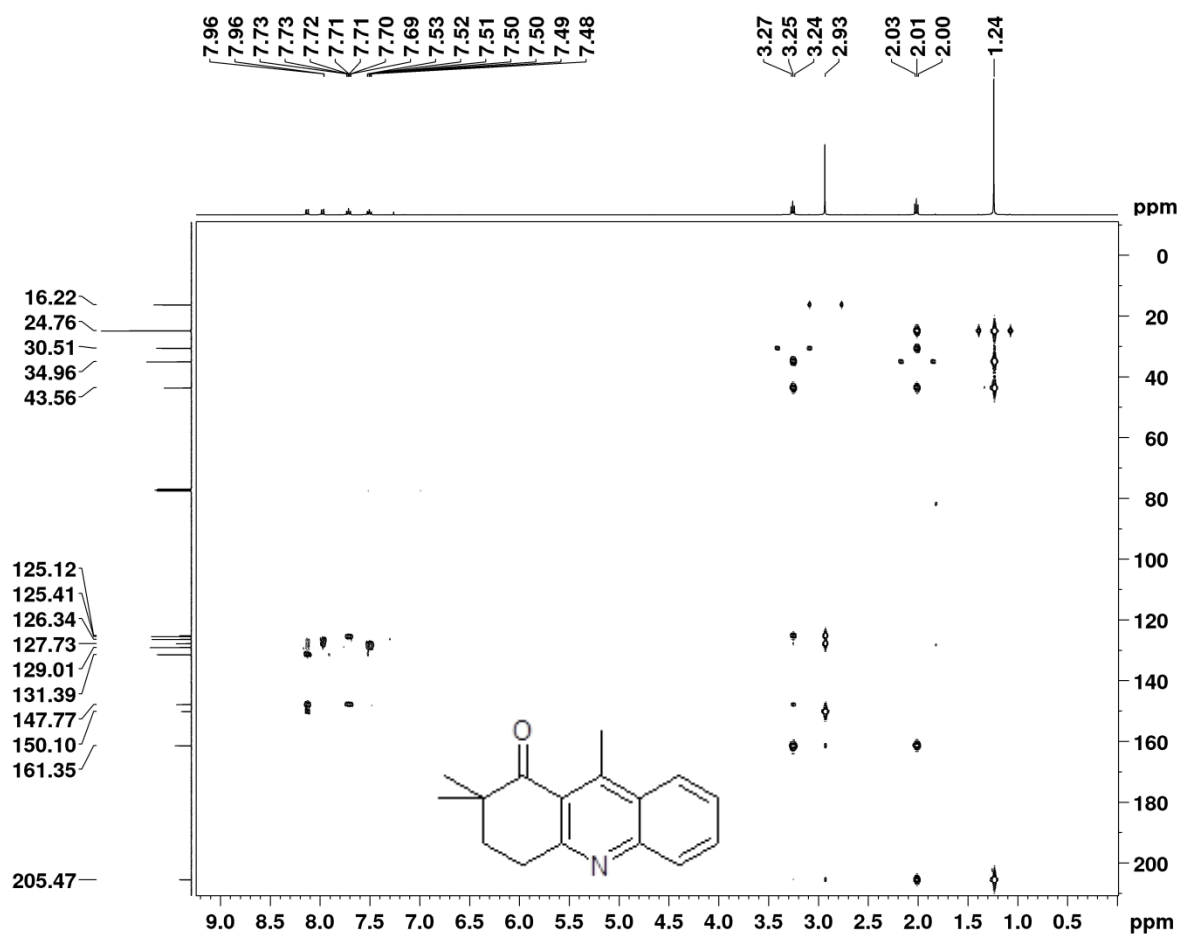

HMBC of 3,4-dihydro-2,2,9-trimethylacridin-1(2H)-one **3d**
